# Supplementary material
Source: PubMed Central journal article supplement (PMC4864432)

# Supplementary Figures

# Clinical course

Figure 1S

ALCL-11

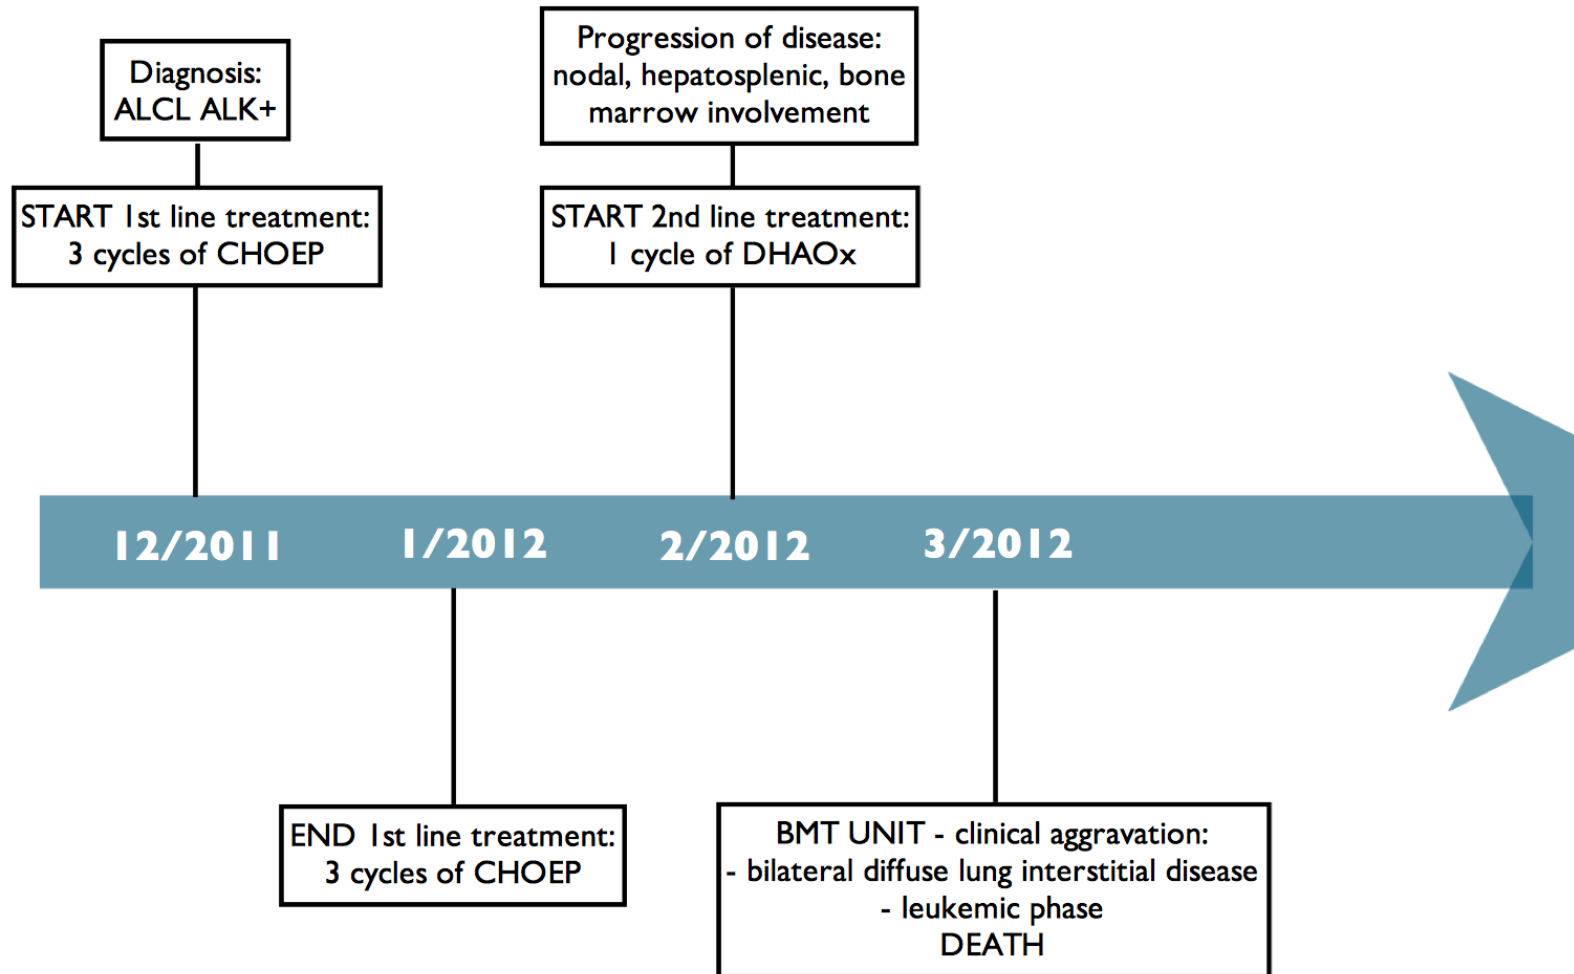

Figure 2S

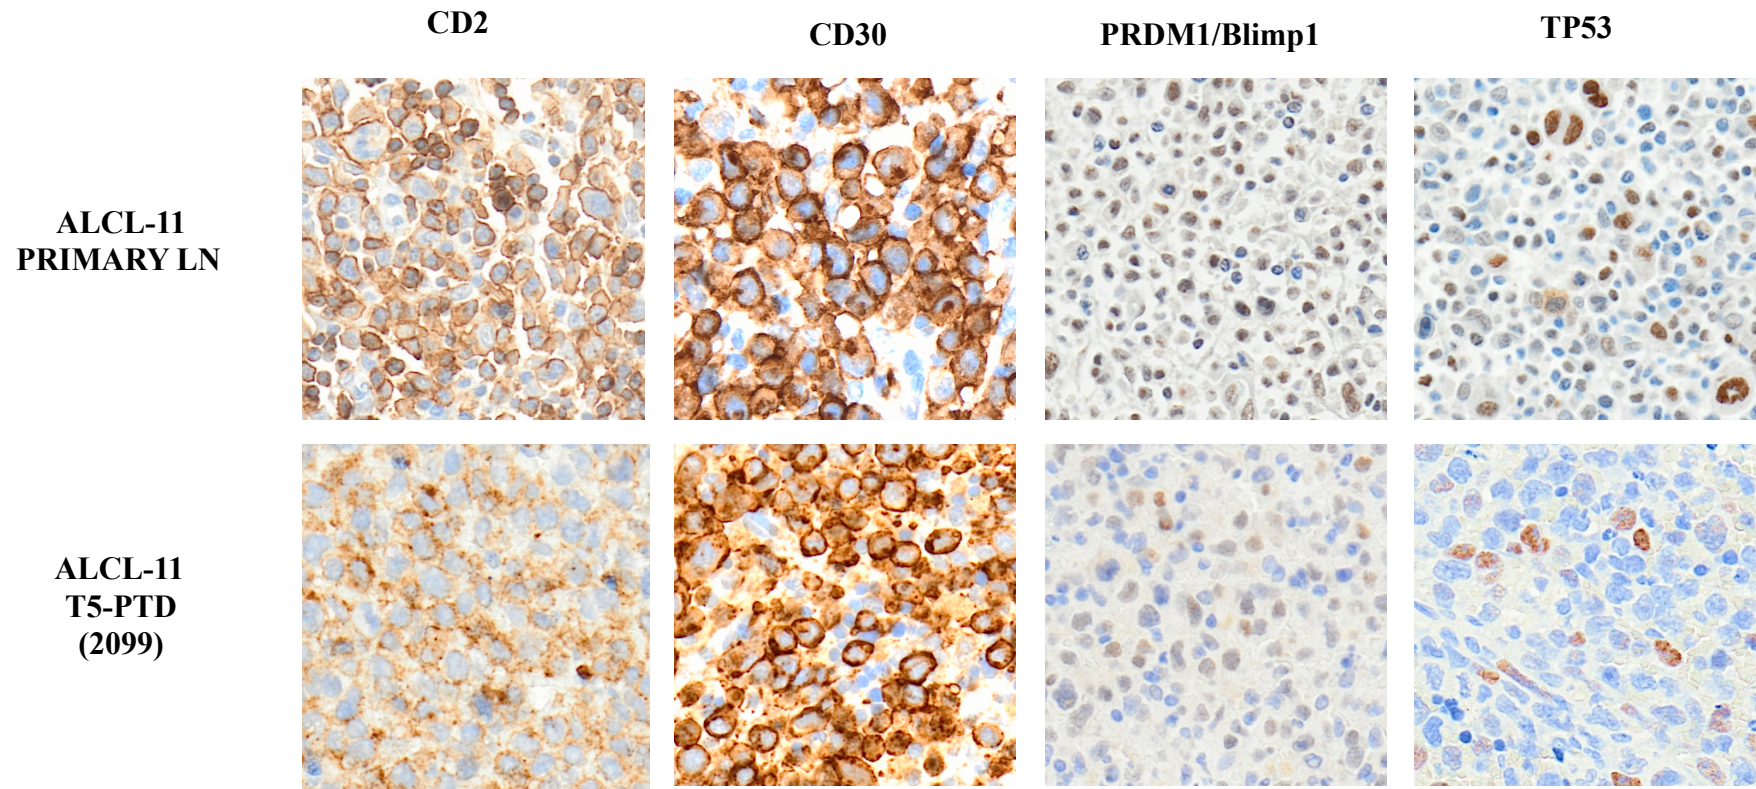

Figure 3S

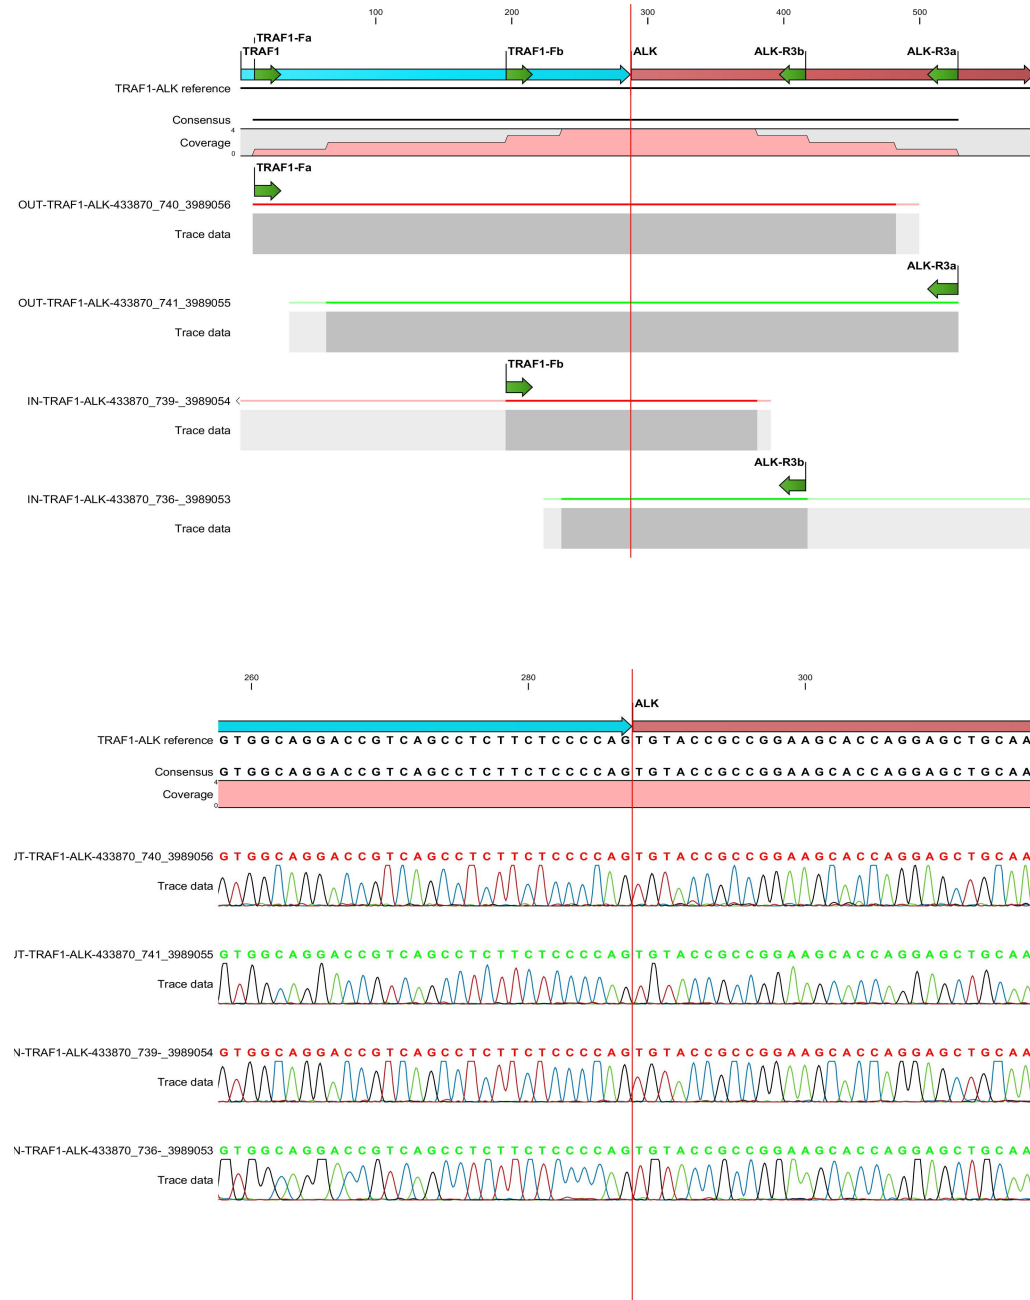

Figure 4S

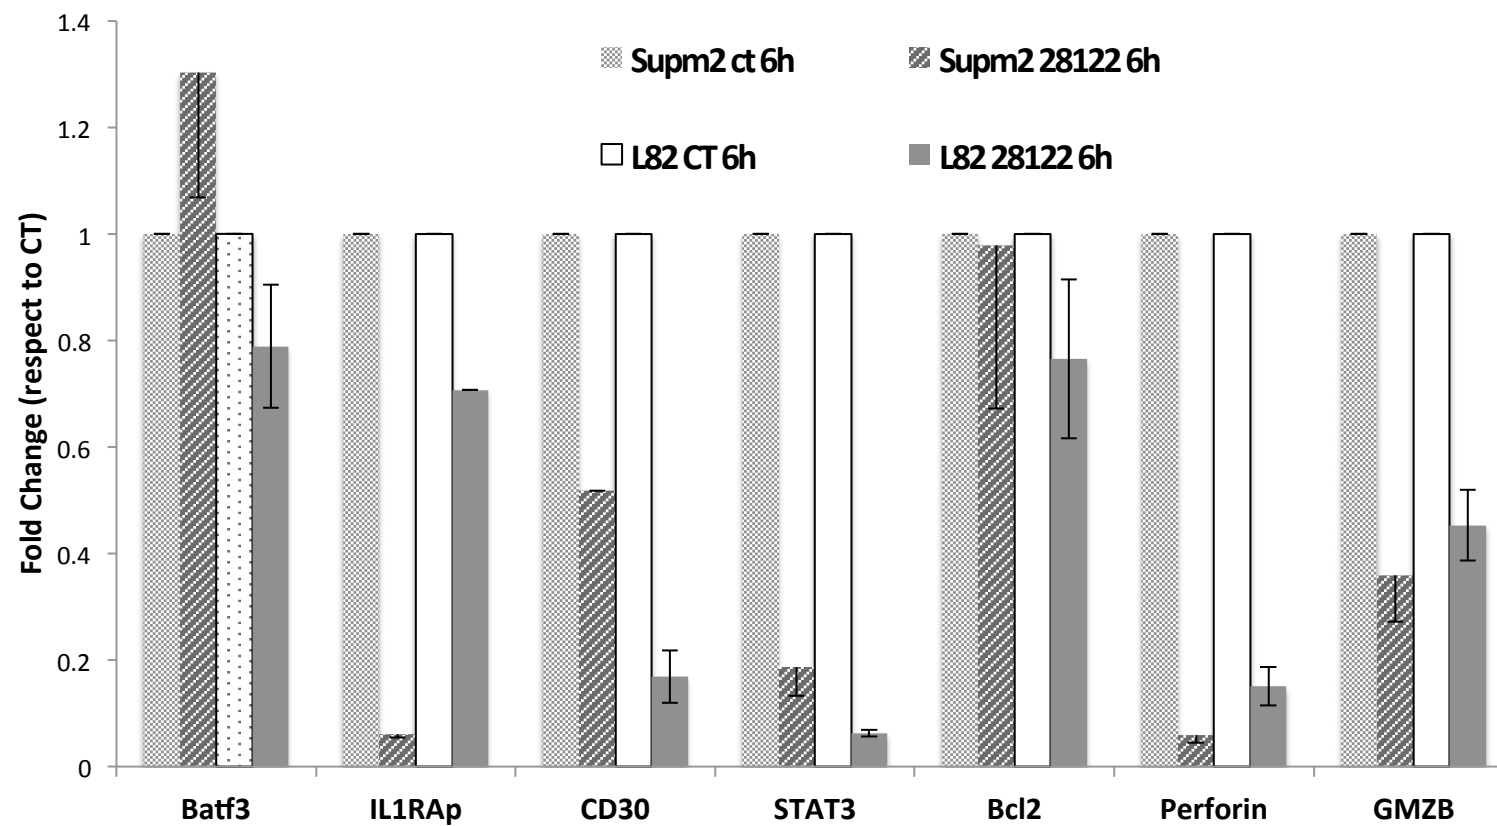

Figure 5S

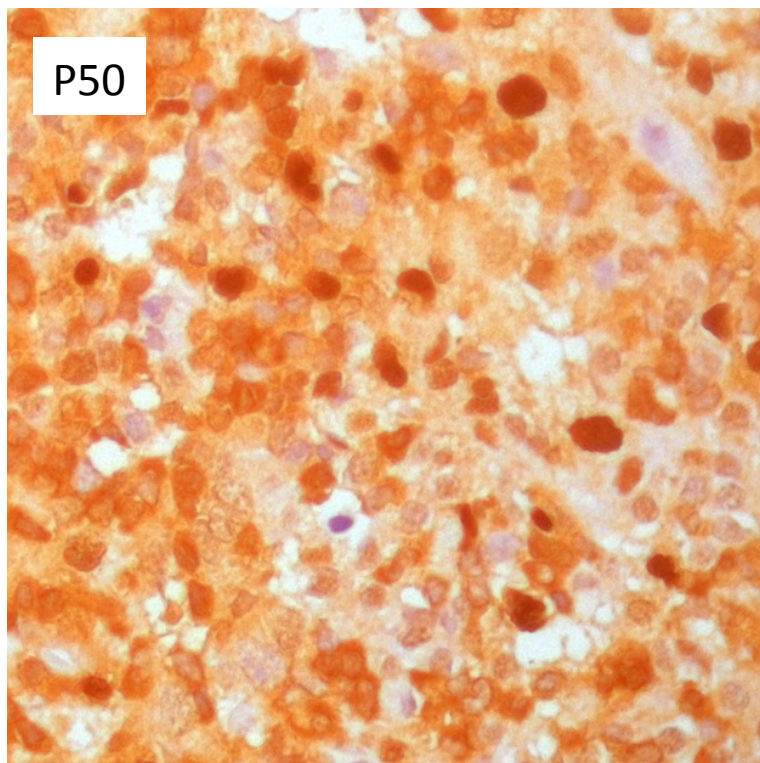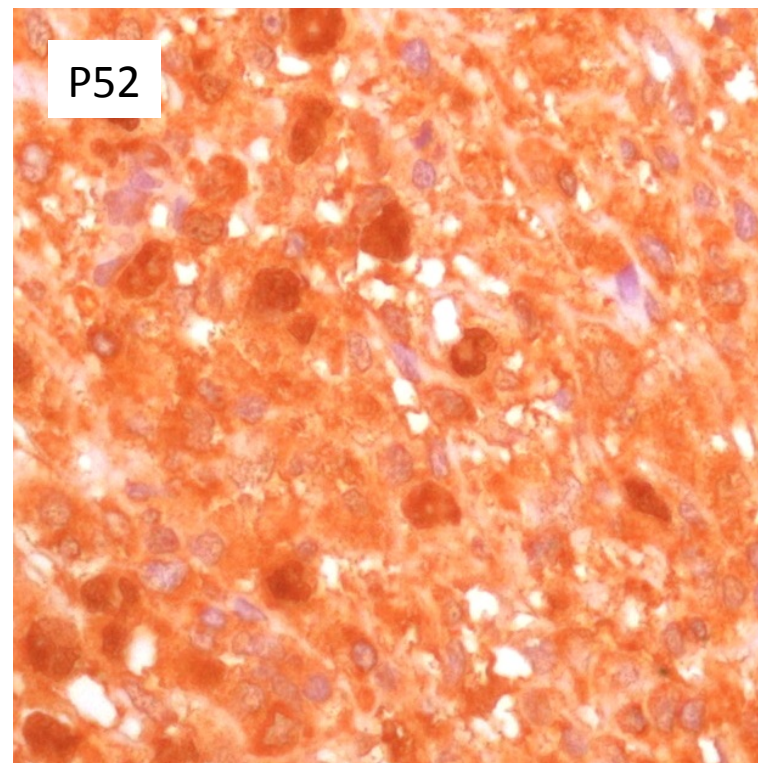

Figure 6S

A

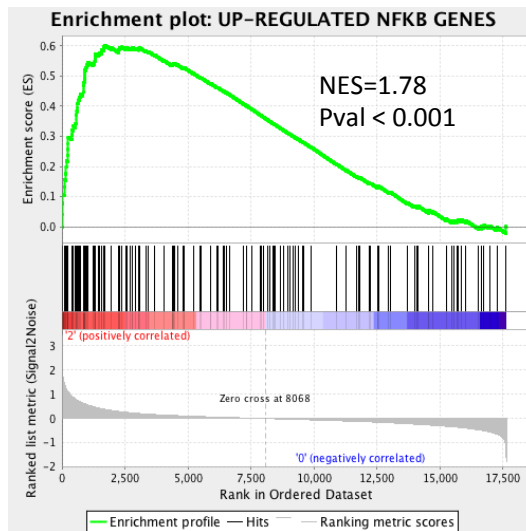

**2232 ALCL-11  
PDT**

Figure 7S

**NSG-#2**

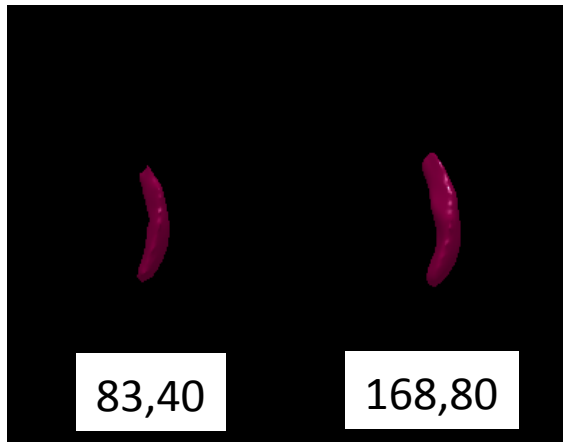

83,40

168,80

14d (Inj)

21d (Inj)

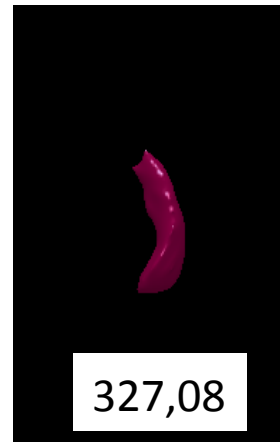

327,08

24d (Inj)

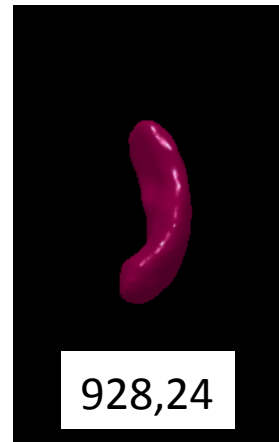

928,24

28d (Inj)

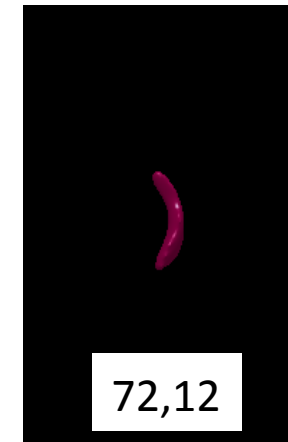

72,12

42d (CTRL)

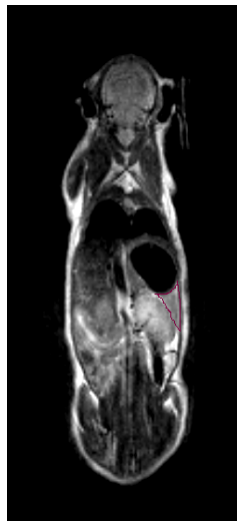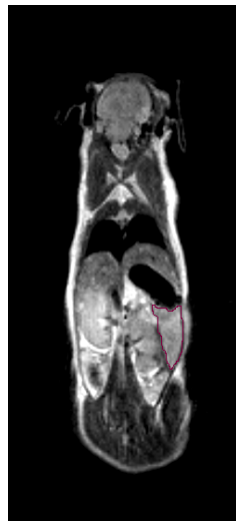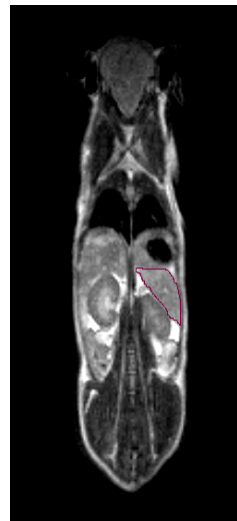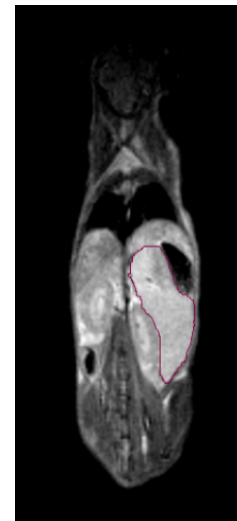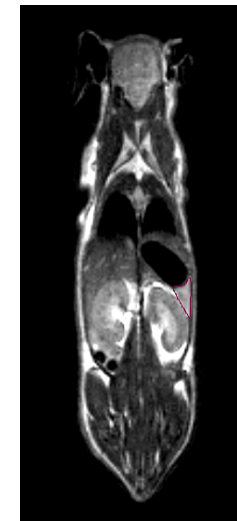



Figure 8S

# 2400 ALCL-11 PDT

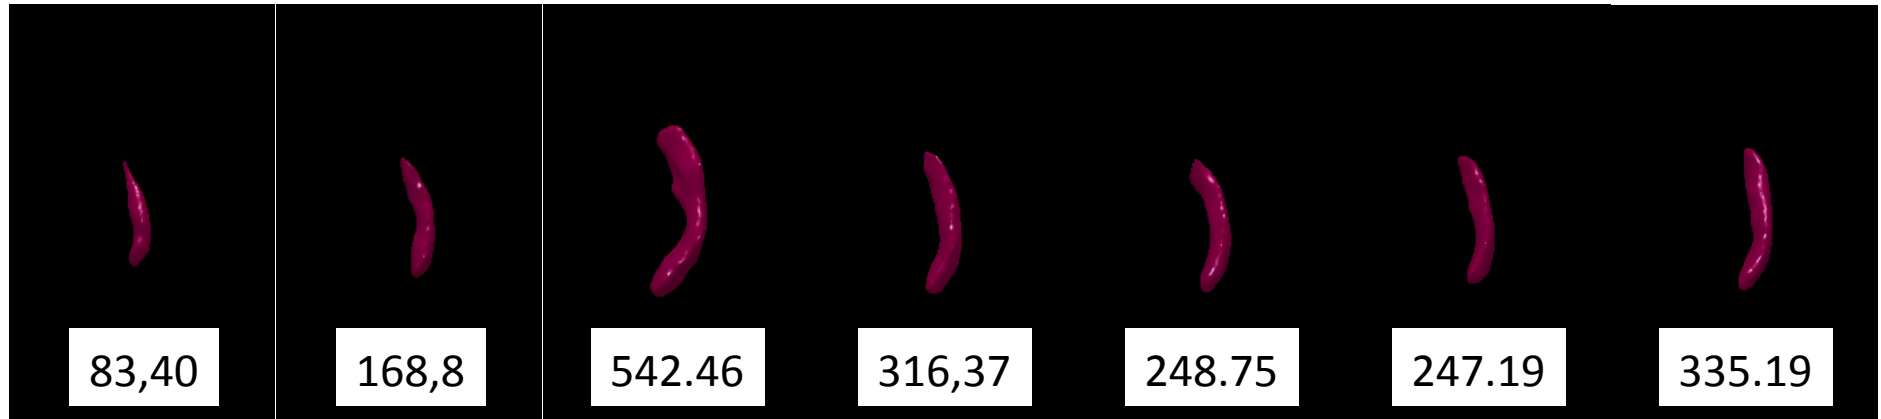

14d (Inj)

21d (Inj)

28d (Inj)

7d (Treat)

14d (Treat)

21d (Untreat) 28d (Untreat)

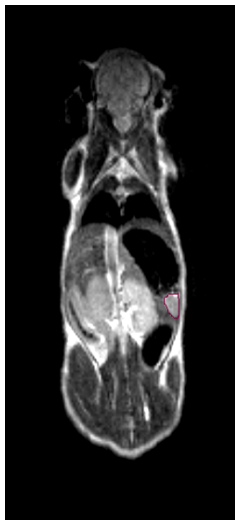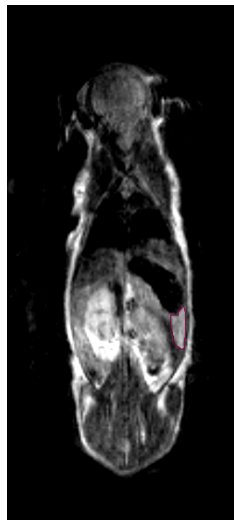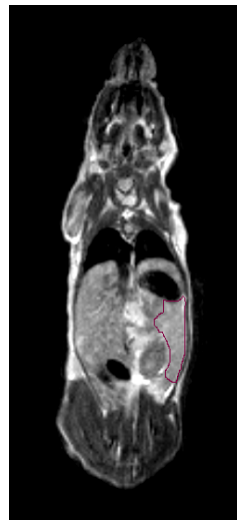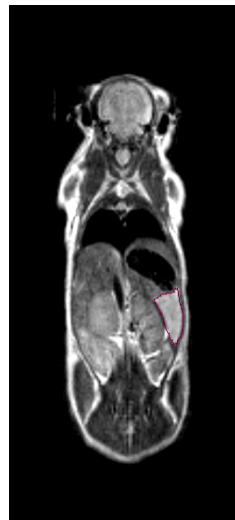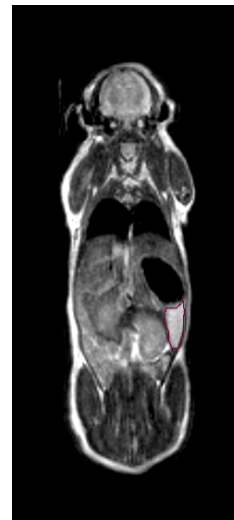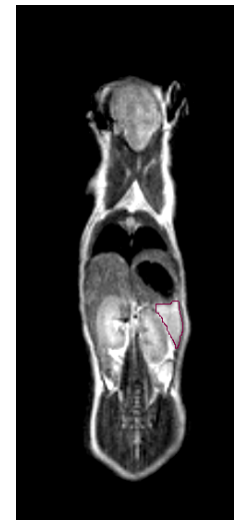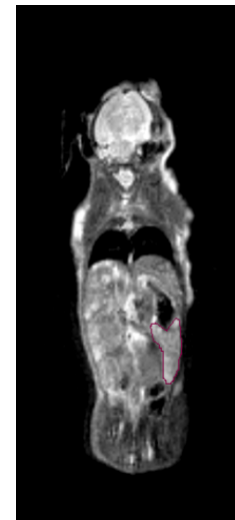

Figure 9S

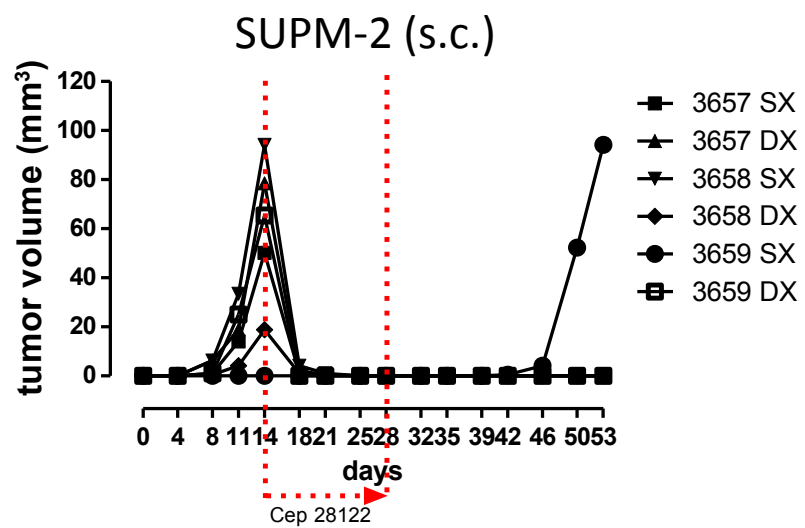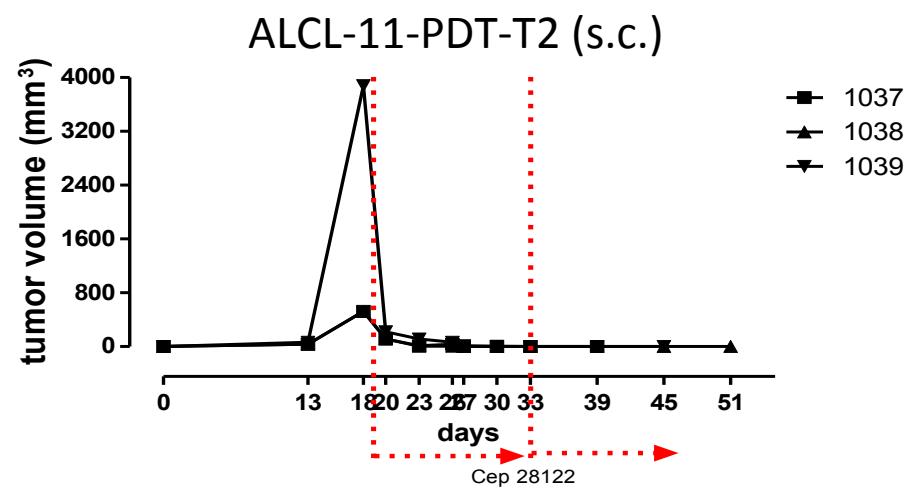

Supplement: NIHMS772837-supplement-Supplementary_Figures.pdf [file NIHMS772837-supplement-Supplementary_Figures.pdf]
